# Supplementary material for: Major Differences in Diet across Three Linguistic Regions of Switzerland: Results from the First National Nutrition Survey menuCH
Source: Nutrients. 2017 Oct 25;9(11):1163. doi: 10.3390/nu9111163 (PMC5707635; doi:10.3390/nu9111163)
Supplement: Supplementary file 1 [file nutrients-09-01163-s001.pdf]

# Online Supplementary Material

## Major differences in diet across three linguistic regions of Switzerland: results from the first national nutrition survey *menuCH*

### Table of content

|              |                                                                                      |   |
|--------------|--------------------------------------------------------------------------------------|---|
| • Table S1.  | Description of foods and beverages included in each food group by food pyramid stage | 2 |
| • Table S2.  | Food group and macronutrient intake, by sex                                          | 4 |
| • Table S3.  | Food group and macronutrient intake, by age                                          | 5 |
| • Figure S1. | Distribution of 24 HDR over weekdays and seasons                                     | 6 |
| • Figure S2. | Participation classification                                                         | 7 |
| • Figure S3. | Heatmap from Switzerland presenting the survey participants' geographical provenance | 8 |

**Table S1.** Description of foods and beverages included in each food group by Swiss Food Pyramid stage

| Swiss Food Pyramid stage   |    | Food subgroup name      | Foods included in this group                                                                                                                                                                                                                                                                                                                                                                  |
|----------------------------|----|-------------------------|-----------------------------------------------------------------------------------------------------------------------------------------------------------------------------------------------------------------------------------------------------------------------------------------------------------------------------------------------------------------------------------------------|
| Non-caloric beverages      | 1  | Water                   | All types of water (e.g. tap, mineral, still, carbonated), <i>consumed 99 of times without added sugars/artificial sweeteners.</i>                                                                                                                                                                                                                                                            |
|                            | 2  | Tea                     | Tea, herbal and fruit tea, <i>consumed 98 of times without added sugars/artificial sweeteners.</i>                                                                                                                                                                                                                                                                                            |
|                            | 3  | Coffee                  | Coffee (e.g. instant, from capsules), and coffee with milk or cream (e.g. cappuccino), coffee substitutes (e.g. chicory), <i>consumed 98 of times without added sugars/artificial sweeteners.</i>                                                                                                                                                                                             |
| Fruit & vegetables         | 4  | Vegetables              | All types of vegetables, green leaves, sprouts, mushrooms, seaweeds, sweet corn, snow peas, fresh green beans, and onions: raw, cooked, dried, canned, in puree, pickled, in soups, in sauce (e.g. tomato sauce), on pizza and quiches, and in sandwiches.<br><u>Except:</u> avocados, olives, herbs, vegetable juices, nor if contained in small amounts in salty snacks, bread, nor sauces. |
|                            | 5  | Fruit                   | All types of fruit: raw, cooked, dried, in puree/compote, and in pies made essentially with fruit (e.g. apples in apple pies).<br><u>Except:</u> fruit juices, fruit jams, candied fruit, nor if contained in small amounts in yogurts, cakes, ice-cream nor other sweets.                                                                                                                    |
|                            | 6  | 100% juices             | 100% fruit and vegetable juices, and smoothies, <i>without added sugars.</i>                                                                                                                                                                                                                                                                                                                  |
| Cereal products & potatoes | 7  | Tuber products          | All types of unprocessed tubers (e.g. potatoes, sweet potatoes) and potato products (e.g. rösti, gnocchi, French fries, mashed potatoes).                                                                                                                                                                                                                                                     |
|                            | 8  | Bread products          | All types of bread (e.g. baguette, bread rolls, milk bread), flat bread, croissants, and crisp bread (e.g. rice crackers, Swedish rolls).<br><u>Except:</u> stuffed croissants and sweet pastries (e.g. chocolate croissants).                                                                                                                                                                |
|                            | 9  | Pasta and rice          | Plain pasta (e.g. penne, spaghetti), stuffed pasta (e.g. ravioli, tortellini), schupfnudeln, spätzli, rice and rice noodles.                                                                                                                                                                                                                                                                  |
|                            | 10 | Other cereal products   | Natural cereal flakes and bran, oatmeal, natural birchermuesli mixes, dried wheat germs, <i>all without added sugars/artificial sweeteners and without major food processing</i> , legumes, wheat and other cereal grains (e.g. barley, quinoa), cereal semolina, flours and starches, and all types of dough.                                                                                |
| Protein-based products     | 11 | Milk                    | Mammals' milk, branded fermented milk drinks, yogurt drink and buttermilk, <i>in liquid form, consumed 96 of times without added sugars/artificial sweeteners.</i>                                                                                                                                                                                                                            |
|                            | 12 | Yogurt and fresh cheese | Mammals' yogurt, branded fermented milk and kefir, fresh cheese (e.g. quark, cottage cheese, ricotta), <i>in semi-solid form, consumed 53 of times with added sugars/artificial sweeteners.</i>                                                                                                                                                                                               |
|                            | 13 | Soft cheese             | Mammals' spread cheese, processed/melted cheese, and soft cheese.                                                                                                                                                                                                                                                                                                                             |
|                            | 14 | Hard cheese             | Mammals' hard cheese.                                                                                                                                                                                                                                                                                                                                                                         |
|                            | 15 | Red meat                | Fresh meat and offal from beef, veal, pork, lamb, mutton, horse, goat, rabbit, and wild red meat (e.g. venison/deer).                                                                                                                                                                                                                                                                         |

|                                |    |                                    |                                                                                                                                                                                                                                                                                                                                                                         |
|--------------------------------|----|------------------------------------|-------------------------------------------------------------------------------------------------------------------------------------------------------------------------------------------------------------------------------------------------------------------------------------------------------------------------------------------------------------------------|
|                                | 16 | Other unprocessed meat             | Fresh meat and offal from chicken, turkey, duck, goose, ostrich, frog, and unprocessed meat and offal from any unspecified animals.                                                                                                                                                                                                                                     |
|                                | 17 | Processed meat                     | Sausages, cold cuts, smoked and cured meat (e.g. ham, bacon, salami, corned beef, beef jerky), meat-based sauces (e.g. Bolognese sauce), and meat-based spread (e.g. liver spread).                                                                                                                                                                                     |
|                                | 18 | Fish and seafood                   | Fresh fish, seafood and snails, and processed fish and seafood products (e.g. fish in crumb, surimi).                                                                                                                                                                                                                                                                   |
|                                | 19 | Other protein-based products       | Eggs, milk and yogurt substitutes (e.g. soya milk), tofu, quorn, and other vegetarian products (e.g. vegetarian sausages), dietetic products rich in proteins (e.g. meal replacements, protein shakes).<br><u>Except:</u> eggs contained in small amounts in cakes nor salty snacks, nor sauces.                                                                        |
| Added fats & nuts              | 20 | Vegetable oil                      | Added vegetable oils (e.g. rapeseed oil, olive oil, sunflower oil) or in dressing sauces (e.g. French dressing, Italian dressing, estimated percentage of vegetable oils in dressings: 40).                                                                                                                                                                             |
|                                | 21 | Butter                             | Added butter to cook and spread on bread.                                                                                                                                                                                                                                                                                                                               |
|                                | 22 | Cream, fatty sauces and other fats | Mammals' cream, margarine, coco fat, added animal fats (e.g. pig fat), any unspecified added fats, mascarpone, sauces rich in oil or butter (e.g. mayonnaise, pesto, sauce café de Paris), other sauces rich in cream or other fats (e.g. carbonara, cocktail sauce, hummus, satay sauce), and coco milk.                                                               |
|                                | 23 | Nuts, seeds, and olives            | Dried nuts and seeds (e.g. almonds, coconut, pumpkin seeds), olives, avocados, guacamole, <i>all with or without salt</i> .                                                                                                                                                                                                                                             |
| Sweets, salty snacks & alcohol | 24 | Added sweeteners                   | Beet and cane sugar, jams, jelly, honey, syrups, polyols, sweet sauces (e.g. caramel and chocolate sauce, maple syrup), sweet spreads (e.g. chocolate spread, peanut butter), sweet topping (e.g. icing), and chocolate powder.<br><u>Except:</u> stevia and artificial sweeteners.                                                                                     |
|                                | 25 | Cakes, desserts, ice-cream         | Ice-cream, sorbet, iced cakes, desserts made with dairy products (e.g. pudding, chocolate mousse, tiramisu), sweet cakes, pies and tarts (e.g. brownies, lemon cakes, muffins), and sweet pastries (e.g. chocolate croissants, doughnuts, waffles).                                                                                                                     |
|                                | 26 | Chocolate products                 | Pure chocolate, chocolate products and confectionary made with chocolate (e.g. filled chocolate, pralines, branded chocolate bars).                                                                                                                                                                                                                                     |
|                                | 27 | Other sweet products               | Sweet and dried biscuits (e.g. shortbread, amaretto, chocolate chip cookies), branded breakfast cereals (e.g. corn-flakes) and industrial birchermuesli mixes, <i>processed and with added sugars/artificial sweeteners</i> , sweets and confectionery (e.g. marzipan, candied fruit, lollipop, marshmallows, nougat), sweet and sports cereal bars (e.g. energy bars). |
|                                | 28 | Salty snacks                       | Crisps, salty popcorn, dried salty crackers (e.g. golden fish biscuits, sticks, pretzels), cocktail canapés, crostini/bruschetta, spring rolls, ham croissants, and sausage rolls.                                                                                                                                                                                      |
|                                | 29 | Soft drinks                        | Sweetened and sugar-free soft drinks, sports and energy drinks, fizzy drinks, ice tea, diluted syrup, drinks made with fruit juices (e.g. lemonades, nectars), and alcoholic drink substitutes (e.g. alcohol-free beers), 'schorle' (i.e. juices mixed with water), <i>consumed 18 of times with artificial sweeteners only</i> .                                       |
|                                | 30 | Beer                               | Beers (with alcohol), ciders and shandy.                                                                                                                                                                                                                                                                                                                                |
|                                | 31 | Wine and other alcoholic beverages | White and red wine, champagne, wine products (e.g. sangria, punch/bowle with alcohol), port, vermouths, liquors, spirits, cocktails and long drinks, 'alcopops', and any other alcoholic drinks (e.g. coffee with spirit).                                                                                                                                              |

## Online Supplementary Material

**Table S2.** Food subgroup and macronutrient intake, by sex

| Daily food subgroup or nutrient intakes,<br>(g or kcal for energy) | Men                        |              |              |              | Women                      |              |              |              |
|--------------------------------------------------------------------|----------------------------|--------------|--------------|--------------|----------------------------|--------------|--------------|--------------|
|                                                                    | Usual intakes <sup>1</sup> |              |              |              | Usual intakes <sup>1</sup> |              |              |              |
|                                                                    | Weighted mean              | Weighted P25 | Weighted P50 | Weighted P75 | Weighted mean              | Weighted P25 | Weighted P50 | Weighted P75 |
| Water                                                              | 1218.2                     | 672.9        | 1099.4       | 1632.6       | 1221.5                     | 755.2        | 1136.4       | 1593.9       |
| Tea                                                                | 194.6                      | 2.3          | 68.3         | 314.1        | 362.8                      | 115.6        | 301.1        | 526.5        |
| Coffee                                                             | 267.0                      | 128.8        | 237.6        | 369.3        | 228.1                      | 90.3         | 203.9        | 330.3        |
| Vegetables                                                         | 197.2                      | 133.2        | 184.6        | 247.8        | 209.5                      | 141.4        | 196.5        | 263.9        |
| Fruit                                                              | 147.4                      | 76.6         | 128.7        | 198.5        | 173.7                      | 97.2         | 157.8        | 232.4        |
| 100% juices                                                        | 59.7                       | 12.3         | 37.0         | 82.3         | 57.2                       | 7.9          | 32.4         | 81.5         |
| Tuber products                                                     | 54.8                       | 33.7         | 51.8         | 72.8         | 44.8                       | 35.3         | 43.4         | 52.8         |
| Bread products                                                     | 137.5                      | 95.6         | 129.1        | 170.3        | 90.4                       | 61.9         | 84.6         | 112.6        |
| Pasta and rice                                                     | 115.1                      | 72.2         | 106.6        | 148.7        | 72.6                       | 42.7         | 67.5         | 96.7         |
| Other cereal products                                              | 39.5                       | 18.4         | 31.7         | 51.9         | 37.5                       | 18.3         | 30.7         | 49.0         |
| Milk                                                               | 120.1                      | 27.4         | 74.1         | 161.0        | 105.7                      | 33.9         | 78.0         | 146.3        |
| Yogurt and fresh cheese                                            | 58.5                       | 9.0          | 38.5         | 91.2         | 61.4                       | 21.2         | 48.8         | 88.9         |
| Soft cheese                                                        | 19.3                       | 7.6          | 15.7         | 27.1         | 13.8                       | 7.4          | 11.9         | 18.1         |
| Hard cheese                                                        | 29.6                       | 13.5         | 23.3         | 38.5         | 20.8                       | 10.8         | 17.8         | 27.5         |
| Red meat                                                           | 47.6                       | 28.1         | 42.5         | 61.4         | 25.9                       | 15.3         | 23.2         | 33.5         |
| Other unprocessed meat                                             | 33.8                       | 17.0         | 29.0         | 45.5         | 26.0                       | 22.9         | 25.7         | 28.9         |
| Processed meat                                                     | 55.5                       | 30.4         | 48.5         | 73.1         | 29.6                       | 14.4         | 24.5         | 39.2         |
| Fish and seafood                                                   | 21.7                       | 6.5          | 15.8         | 30.9         | 19.6                       | 9.3          | 16.1         | 26.1         |
| Other protein-based products                                       | 23.4                       | 8.5          | 16.1         | 29.7         | 22.1                       | 7.5          | 14.9         | 28.2         |
| Vegetable oil                                                      | 12.6                       | 7.0          | 10.8         | 16.1         | 12.1                       | 8.5          | 11.4         | 14.9         |
| Butter                                                             | 8.5                        | 2.9          | 6.7          | 12.1         | 6.6                        | 2.6          | 5.1          | 9.0          |
| Cream, fatty sauces and other fats                                 | 35.1                       | 21.4         | 31.2         | 44.5         | 26.0                       | 15.0         | 23.0         | 33.6         |
| Nuts, seeds, olives                                                | 9.1                        | 1.9          | 4.7          | 10.9         | 11.3                       | 2.8          | 7.1          | 14.7         |
| Added sweeteners                                                   | 26.6                       | 10.4         | 21.4         | 36.8         | 18.7                       | 8.5          | 15.7         | 25.6         |
| Cakes, desserts, ice-cream                                         | 43.2                       | 20.4         | 38.3         | 60.5         | 34.5                       | 19.5         | 30.5         | 45.0         |
| Chocolate products                                                 | 10.1                       | 2.3          | 6.7          | 14.3         | 10.5                       | 4.5          | 8.4          | 14.2         |
| Other sweet products                                               | 12.2                       | 2.0          | 7.1          | 17.1         | 11.0                       | 3.8          | 8.0          | 14.8         |
| Salty snacks                                                       | 10.8                       | 2.6          | 6.8          | 14.4         | 7.8                        | 3.5          | 6.3          | 10.4         |
| Soft drinks                                                        | 290.3                      | 60.7         | 206.5        | 430.3        | 154.9                      | 33.0         | 94.4         | 212.8        |
| Beer                                                               | 185.8                      | 31.4         | 109.2        | 259.4        | 31.8                       | 3.4          | 15.3         | 42.9         |
| Wine and other alcoholic beverages                                 | 106.1                      | 24.2         | 73.7         | 154.2        | 71.5                       | 17.4         | 49.7         | 103.5        |
| Total energy                                                       | 2537.8                     | 2104.6       | 2487.9       | 2914.1       | 1899.2                     | 1624.4       | 1871.7       | 2145.2       |
| Total proteins                                                     | 98.3                       | 80.5         | 96.4         | 114.0        | 70.1                       | 59.4         | 68.6         | 79.3         |
| Total carbohydrates                                                | 264.8                      | 206.8        | 256.5        | 313.6        | 202.2                      | 162.9        | 197.5        | 236.3        |
| Total fat                                                          | 101.9                      | 81.3         | 99.3         | 119.6        | 79.2                       | 65.6         | 77.6         | 91.2         |
| Total alcohol                                                      | 18.4                       | 6.9          | 13.7         | 24.8         | 8.7                        | 2.0          | 5.0          | 11.1         |

<sup>1</sup> Usual intakes were modelled with SPADE using age as covariate. Survey weights corrected for non-response based 6 socio-demographic parameters (i.e., age, sex, marital status, major area, nationality and household size) and uneven distribution of 24HDR over seasons and weekdays.

## Online Supplementary Material

**Table S3.** Food subgroup and macronutrient intake, by age

| Daily food subgroup or nutrient intakes,<br>(g or kcal for energy) | 18-34 years old            |              | 35-49 years old            |              | 50-64 years old            |              | 65-75 years old            |              |
|--------------------------------------------------------------------|----------------------------|--------------|----------------------------|--------------|----------------------------|--------------|----------------------------|--------------|
|                                                                    | Usual intakes <sup>1</sup> |              | Usual intakes <sup>1</sup> |              | Usual intakes <sup>1</sup> |              | Usual intakes <sup>1</sup> |              |
|                                                                    | Weighted mean              | Weighted P50 |
| Water                                                              | 1471.4                     | 1382.4       | 1267.5                     | 1176.2       | 1083.7                     | 990.8        | 923.1                      | 832.5        |
| Tea                                                                | 223.2                      | 120.6        | 264.6                      | 174.4        | 298.3                      | 219.8        | 361.7                      | 301.4        |
| Coffee                                                             | 152.0                      | 116.5        | 263.5                      | 238.2        | 303.2                      | 275.4        | 276.9                      | 249.7        |
| Vegetables                                                         | 185.2                      | 172.2        | 207.1                      | 194.5        | 213.5                      | 200.3        | 216.7                      | 204.1        |
| Fruit                                                              | 127.3                      | 110.4        | 151.7                      | 135.4        | 181.3                      | 164.8        | 214.9                      | 199.2        |
| 100% juices                                                        | 62.7                       | 34.4         | 60.5                       | 33.7         | 58.2                       | 33.8         | 58.1                       | 35.0         |
| Tuber products                                                     | 49.7                       | 47.6         | 47.0                       | 44.6         | 48.2                       | 45.7         | 53.4                       | 50.9         |
| Bread products                                                     | 115.2                      | 105.7        | 112.9                      | 104.0        | 109.2                      | 100.4        | 106.6                      | 98.0         |
| Pasta and rice                                                     | 111.3                      | 103.4        | 99.6                       | 92.0         | 81.2                       | 73.5         | 71.8                       | 64.6         |
| Other cereal products                                              | 46.3                       | 38.4         | 41.1                       | 33.8         | 36.0                       | 29.2         | 29.3                       | 23.5         |
| Milk                                                               | 127.7                      | 86.8         | 115.8                      | 79.0         | 100.0                      | 65.9         | 89.7                       | 59.1         |
| Yogurt and fresh cheese                                            | 52.1                       | 35.7         | 54.4                       | 38.2         | 66.2                       | 52.0         | 73.7                       | 60.9         |
| Soft cheese                                                        | 15.6                       | 12.9         | 17.0                       | 14.2         | 16.0                       | 13.2         | 15.6                       | 13.1         |
| Hard cheese                                                        | 20.5                       | 16.4         | 25.8                       | 21.2         | 27.2                       | 22.3         | 31.3                       | 26.1         |
| Red meat                                                           | 33.3                       | 29.1         | 38.2                       | 33.8         | 36.1                       | 31.9         | 35.9                       | 31.6         |
| Other unprocessed meat                                             | 37.0                       | 35.2         | 29.4                       | 28.0         | 23.3                       | 22.0         | 17.0                       | 15.9         |
| Processed meat                                                     | 46.2                       | 39.2         | 41.4                       | 35.0         | 38.2                       | 32.1         | 36.8                       | 30.8         |
| Fish and seafood                                                   | 18.0                       | 13.5         | 22.8                       | 18.1         | 22.7                       | 17.9         | 17.7                       | 13.0         |
| Other protein-based products                                       | 25.3                       | 17.6         | 22.8                       | 15.8         | 20.8                       | 14.3         | 18.8                       | 12.7         |
| Vegetable oil                                                      | 11.5                       | 10.3         | 12.6                       | 11.4         | 12.7                       | 11.4         | 12.4                       | 11.1         |
| Butter                                                             | 5.4                        | 3.8          | 6.9                        | 5.4          | 8.2                        | 6.6          | 11.4                       | 9.7          |
| Cream, fatty sauces and other fats                                 | 31.7                       | 28.0         | 31.8                       | 28.1         | 30.5                       | 27.0         | 29.5                       | 26.1         |
| Nuts, seeds, olives                                                | 10.0                       | 5.8          | 10.1                       | 5.9          | 9.6                        | 5.7          | 8.9                        | 5.2          |
| Added sweeteners                                                   | 18.0                       | 14.1         | 21.4                       | 17.4         | 22.2                       | 18.2         | 26.8                       | 22.7         |
| Cakes, desserts, ice-cream                                         | 36.6                       | 31.4         | 41.4                       | 36.6         | 38.0                       | 33.3         | 37.1                       | 32.8         |
| Chocolate products                                                 | 12.3                       | 9.5          | 11.3                       | 8.7          | 8.4                        | 6.2          | 7.0                        | 4.9          |
| Other sweet products                                               | 11.0                       | 7.2          | 11.2                       | 7.5          | 10.8                       | 7.3          | 11.4                       | 8.1          |
| Salty snacks                                                       | 12.9                       | 9.5          | 10.1                       | 7.2          | 6.0                        | 3.7          | 6.4                        | 4.3          |
| Soft drinks                                                        | 317.4                      | 244.0        | 219.7                      | 149.9        | 161.7                      | 100.1        | 106.0                      | 51.3         |
| Beer                                                               | 137.2                      | 68.6         | 118.0                      | 59.8         | 80.5                       | 33.3         | 45.7                       | 10.5         |
| Wine and other alcoholic beverages                                 | 55.9                       | 27.8         | 81.2                       | 54.0         | 107.0                      | 81.1         | 132.5                      | 107.6        |
| Total energy                                                       | 2254.6                     | 2195.9       | 2222.4                     | 2164.4       | 2153.7                     | 2096.1       | 2052.8                     | 1999.3       |
| Total proteins                                                     | 85.2                       | 82.7         | 85.0                       | 82.5         | 81.6                       | 79.2         | 76.2                       | 74.0         |
| Total carbohydrates                                                | 251.5                      | 243.3        | 234.9                      | 226.8        | 219.4                      | 211.5        | 205.3                      | 198.0        |
| Total fat                                                          | 90.8                       | 88.3         | 91.2                       | 88.7         | 88.7                       | 86.2         | 86.7                       | 84.4         |
| Total alcohol                                                      | 9.4                        | 5.7          | 12.5                       | 8.2          | 15.3                       | 10.3         | 18.7                       | 12.9         |

<sup>1</sup> Usual intakes were modelled with SPADE. Survey weights corrected for non-response based 6 socio-demographic parameters (i.e., age, sex, marital status, major area, nationality and household size) and uneven distribution of 24HDR over seasons and weekdays.

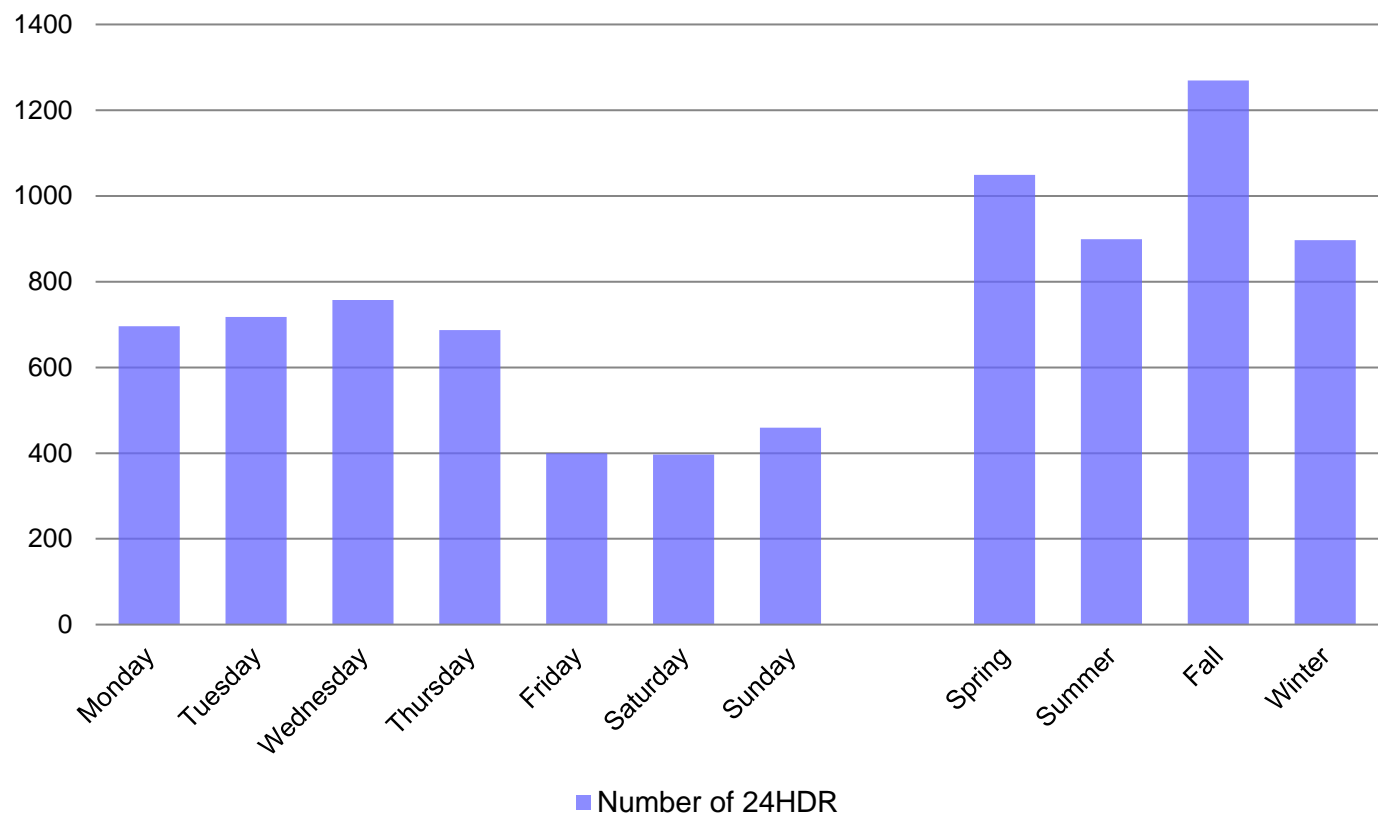

**Figure S1.** Distribution of 24 HDR days (n=4,114) over weekdays and seasons

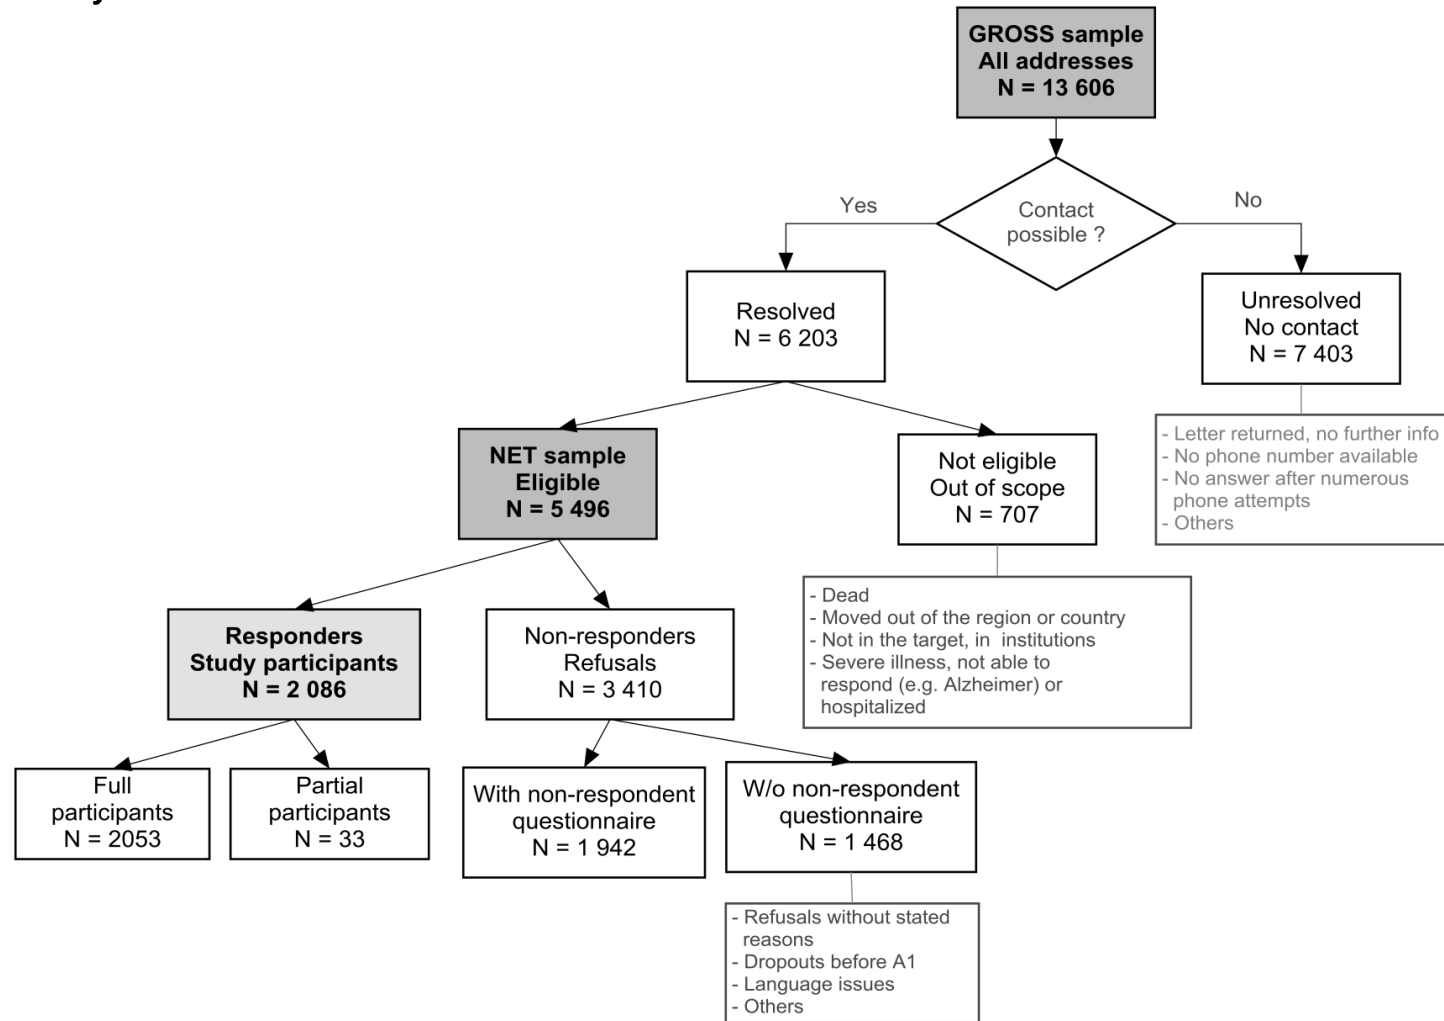

**Figure S2.** Participation classification, following 2014 European Food Safety Authority's classification recommendations for food consumption surveys. Full participation implies the entire dataset was available: two 24HDR, a complete questionnaire, measured (or self-reported when impossible) weight and height.

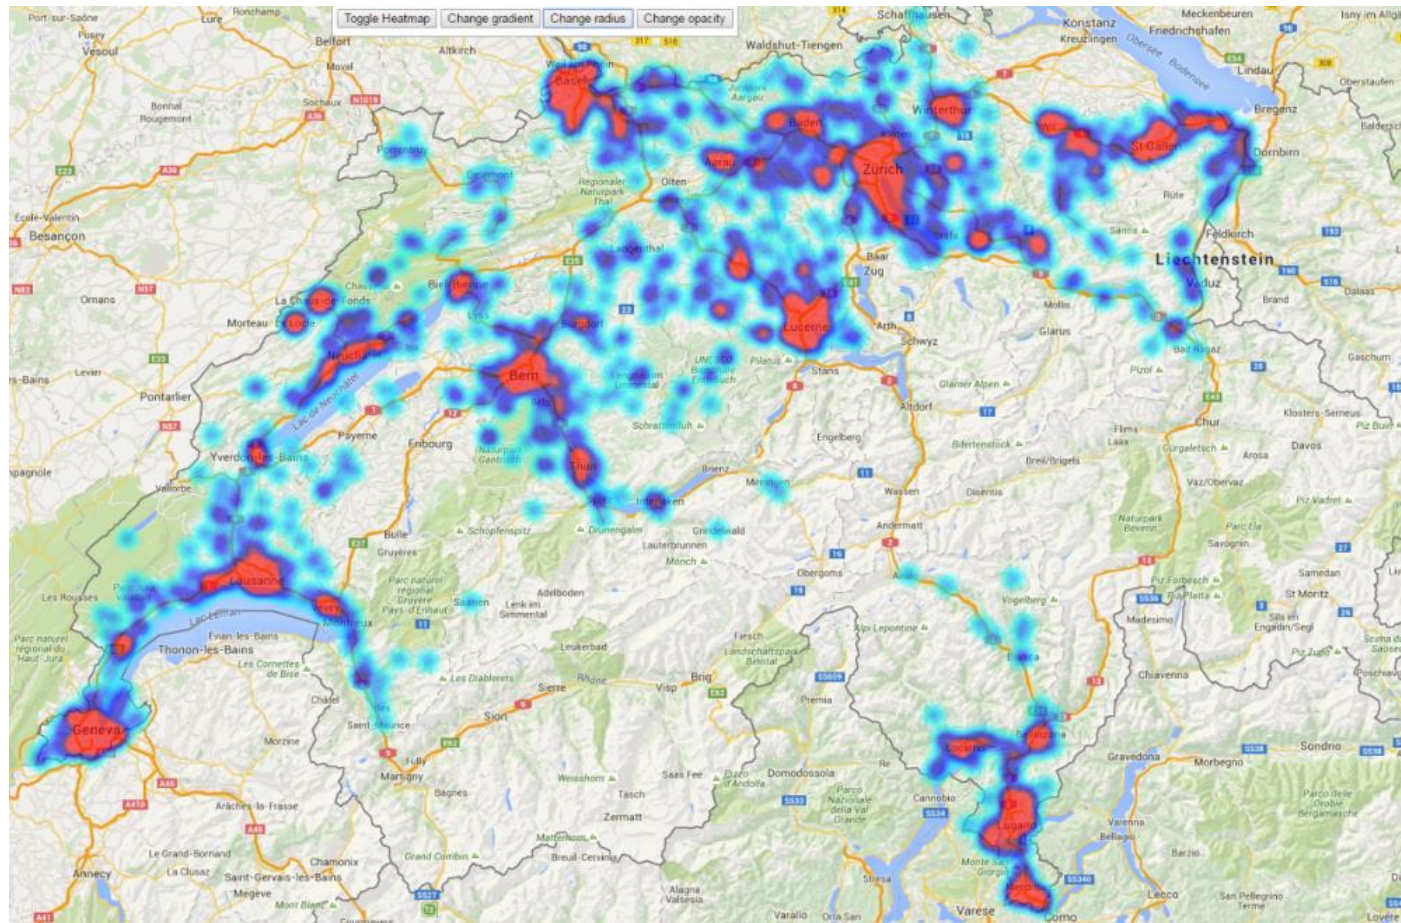

**Figure S3.** Heatmap from Switzerland presenting the survey participants' geographical provenance based on the addresses provided by the Federal Statistical Office. Geolocalization through Google Maps.
